# Supplementary material for: Adsorption behavior and structure transformation of mesoporous metal–organic frameworks towards arsenates and organic pollutants in aqueous solution
Source: Royal Society of Chemistry journal article supplement (doi:10.1039/c8qm00002f), 2018-01-01
Supplement: c8qm00002f1.pdf [file c8qm00002f1.pdf]

## **Adsorption Behavior and Structure Transformation of Mesoporous Metal-Organic Frameworks Towards Arsenates and Organic Pollutants in Aqueous Solution**

Jianhua Cai,<sup>\*,[a,b]</sup> Xuhui Mao<sup>\*,[a]</sup> and Wei-Guo Song<sup>[b]</sup>

<sup>a</sup>School of Resource and Environmental Sciences, Wuhan University, Wuhan 430072, P. R. China

<sup>b</sup>Key Laboratory of Molecular Nanostructure and Nanotechnology, Institute of Chemistry, Chinese Academy of Sciences, Beijing 100190, P. R. China

## Table of Content

|                                                                                                                                               |           |
|-----------------------------------------------------------------------------------------------------------------------------------------------|-----------|
| 1, Energy dispersive spectroscopy analysis and reports of as obtained MIL-100(Fe, Al).<br>Figure S1                                           | S2        |
| 2, Nitrogen adsorption-desorption isotherms of MIL-100(Fe, Al) after adsorption.<br>Figure S2, Table S1                                       | S3        |
| 3, FT-IR spectra of MIL-100(Fe, Al) after adsorbing pollutants.<br>Figure S3                                                                  | S4        |
| 4, Arsenates adsorption performances of MIL-100(Fe, Al) adsorbents under different pH values.<br>Table S2, Table S3<br>S5                     |           |
| 5, Removal of Low-level arsenate by MIL-100(Fe, Al) adsorbents.<br>Figure S4                                                                  | S5        |
| 4, Elements dispersion of TEM mapping images of MIL-100(Fe) after saturated adsorption in 100 ppm $\text{HAsO}_4^{2-}$ solution.<br>Figure S5 | S6        |
| 5, Elements dispersion of TEM mapping images of MIL-100(Al) after saturated adsorption in 100 ppm $\text{HAsO}_4^{2-}$ solution.<br>Figure S6 | S6        |
| 6, Digital photo images of adsorbed MIL-100(Fe) and MIL-100(Al).<br>Figure S7                                                                 | S7        |
| 7, TG curves of MIL-100(Fe, Al) under air ambience.<br>Figure S8                                                                              | S7        |
| 8, X-ray photoelectron spectroscopy (XPS) data of MIL-100(Fe, Al) and adsorbed samples.<br>Figure S9<br>Table S4                              | S8<br>S8  |
| 9, Mössbauer spectra of MIL-100(Fe) and adsorbed samples.<br>Figure S10<br>Table S5                                                           | S9<br>S10 |

## Supporting Information:

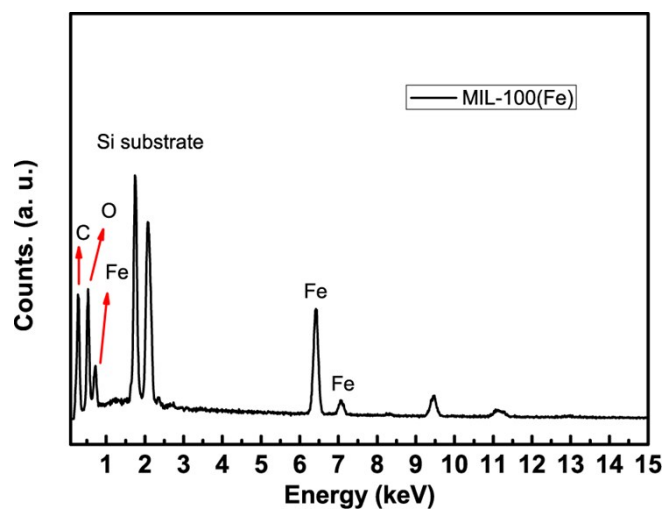

| Element | weight % | Atom number % |
|---------|----------|---------------|
| C K     | 45.74    | 63.07         |
| O K     | 28.21    | 29.20         |
| Fe K    | 26.05    | 7.73          |
| Total   | 100.00   |               |

(a)

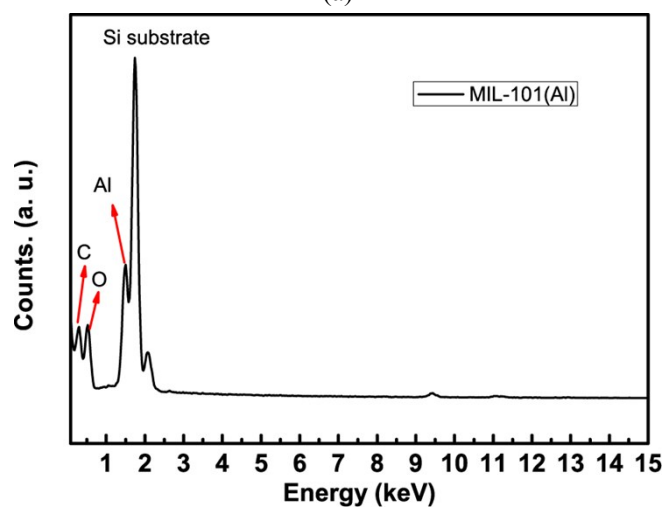

| Element | weight % | Atom number % |
|---------|----------|---------------|
| C K     | 47.94    | 56.00         |
| O K     | 47.42    | 41.59         |
| Al K    | 4.65     | 2.42          |
| Total   | 100.00   |               |

(b)

**Figure S1.** EDS analysis and reports: (a) MIL-100(Fe), (b) MIL-100(Al). (the other peaks not

indexed came from Pt which was used in preparation of the samples for characterization)

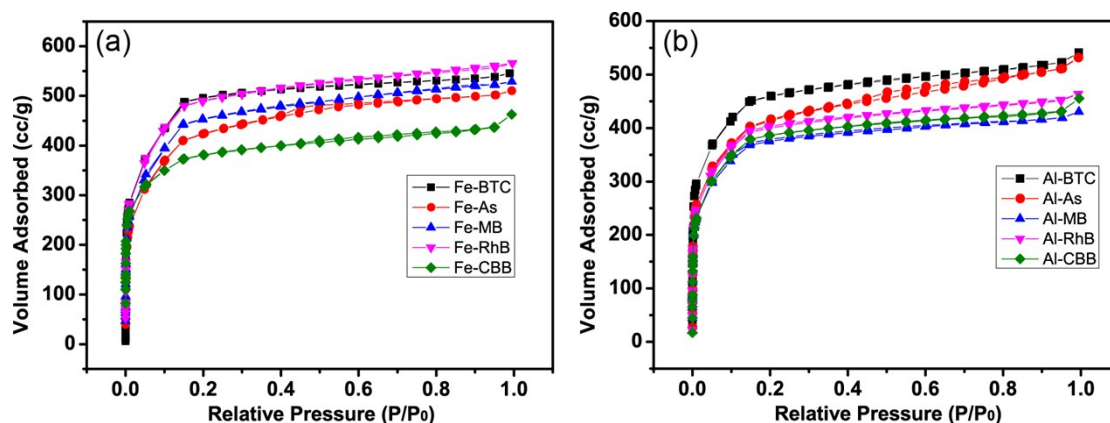

**Figure S2.** (a) Nitrogen adsorption-desorption isotherms of MIL-100(Fe) after adsorption in 100 ppm pollutants, (b) Nitrogen adsorption-desorption isotherms of MIL-100(Al) after adsorption in 100 ppm pollutants.

**Table S1.** BET surface areas, pore size distribution and pore volume analysis.

| Samples       | $S_{\text{BET}}$<br>m <sup>2</sup> /g | $V_{\text{micro}}$<br>cc/g | Pore<br>Size/nm | Samples       | $S_{\text{BET}}$<br>m <sup>2</sup> /g | $V_{\text{micro}}$<br>cc/g | Pore<br>Size/nm |
|---------------|---------------------------------------|----------------------------|-----------------|---------------|---------------------------------------|----------------------------|-----------------|
| <b>Fe</b>     | 1369.6                                | 0.710                      | 1.107           | <b>Al</b>     | 1370                                  | 0.665                      | 0.969           |
| <b>Fe-As</b>  | 1131                                  | 0.589                      | 0.581           | <b>Al-As</b>  | 1200                                  | 0.567                      | 0.960           |
| <b>Fe-MB</b>  | 1223                                  | 0.636                      | 0.628           | <b>Al-MB</b>  | 1084                                  | 0.547                      | 0.960           |
| <b>Fe-RhB</b> | 1345                                  | 0.712                      | 0.628           | <b>Al-RhB</b> | 1149                                  | 0.584                      | 0.951           |
| <b>Fe-CBB</b> | 1223                                  | 0.553                      | 0.452           | <b>Al-CBB</b> | 1082                                  | 0.565                      | 0.951           |

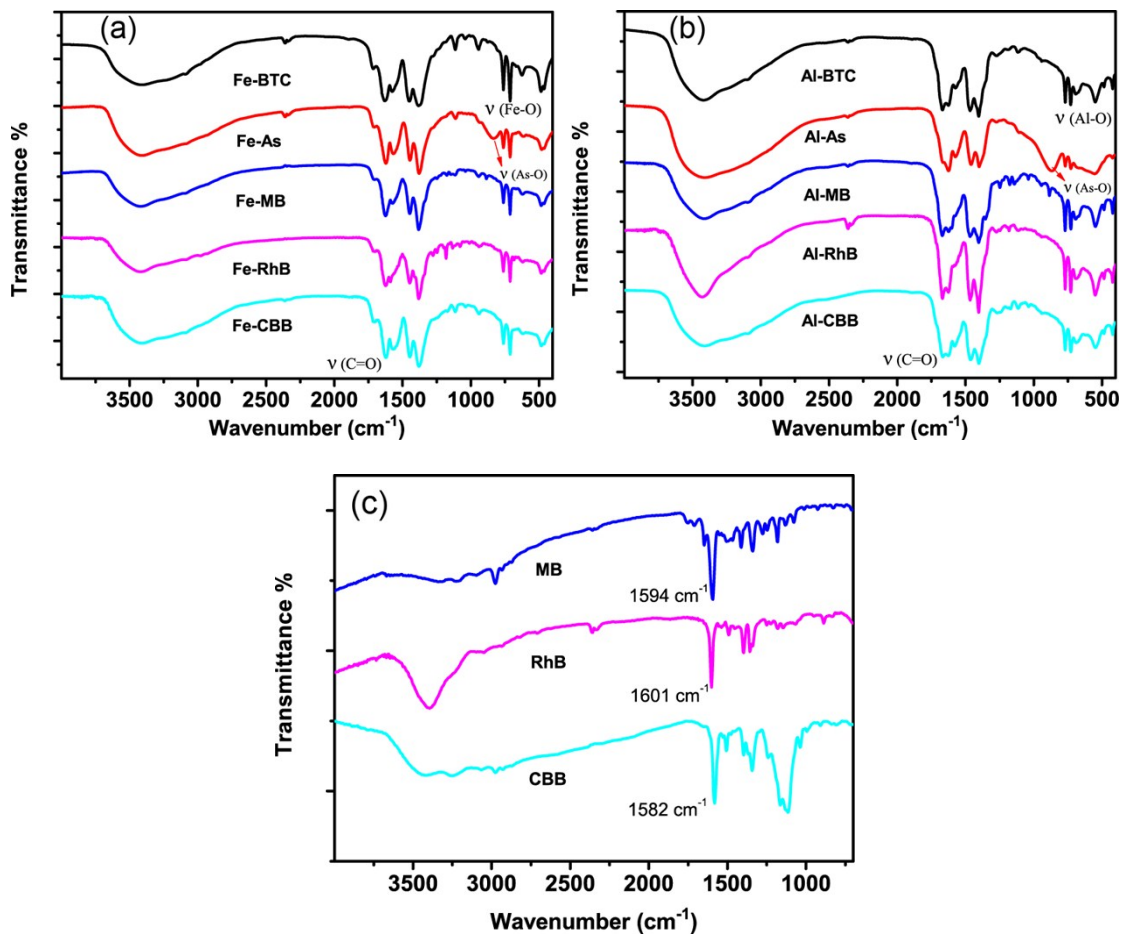

**Figure S3.** (a) FT-IR spectra of MIL-100(Fe) and the corresponding adsorbed samples, (b) FT-IR spectra of MIL-100(Al) and the corresponding adsorbed samples, (c) FT-IR spectra of MB, RhB and CBB.

**Table S2.** Arsenates adsorption performances of MIL-100(Fe) and MIL-100(Al) under different pH values in 10 ppm arsenate solution ( $T = 25\text{ }^{\circ}\text{C}$ ; adsorbent doses =  $0.4\text{ g L}^{-1}$ ).

| Samples                  | As(V) concentrations of solutions (ppm) |      |       |
|--------------------------|-----------------------------------------|------|-------|
|                          | pH 4                                    | pH 7 | pH 11 |
| <b>Before adsorption</b> | 10                                      | 10   | 10    |
| MIL-100(Fe)              | 6.30                                    | 2.46 | 0.57  |
| MIL-100(Al)              | 2.95                                    | 1.04 | 0.11  |

**Table S3.** The selectivity experiments of MIL-100(Fe, Al) in 10 ppm arsenate solution with 50 ppm disturbing ions ( $T = 25\text{ }^{\circ}\text{C}$ ; adsorbent doses =  $0.4\text{ g L}^{-1}$ ).

| Samples                  | Concentrations of As(V) and disturbing ions (ppm) |                 |       |                               |       |                              |       |                               |
|--------------------------|---------------------------------------------------|-----------------|-------|-------------------------------|-------|------------------------------|-------|-------------------------------|
|                          | As(V)                                             | Cl <sup>-</sup> | As(V) | SO <sub>4</sub> <sup>2-</sup> | As(V) | NO <sub>3</sub> <sup>-</sup> | As(V) | HCO <sub>3</sub> <sup>-</sup> |
| <b>Before adsorption</b> | 10                                                | 50              | 10    | 50                            | 10    | 50                           | 10    | 50                            |
| MIL-100(Fe)              | 3.77                                              |                 | 2.51  |                               | 3.75  |                              | 0.191 |                               |
| MIL-100(Al)              | 1.33                                              |                 | 1.55  |                               | 1.53  |                              | 0.122 |                               |

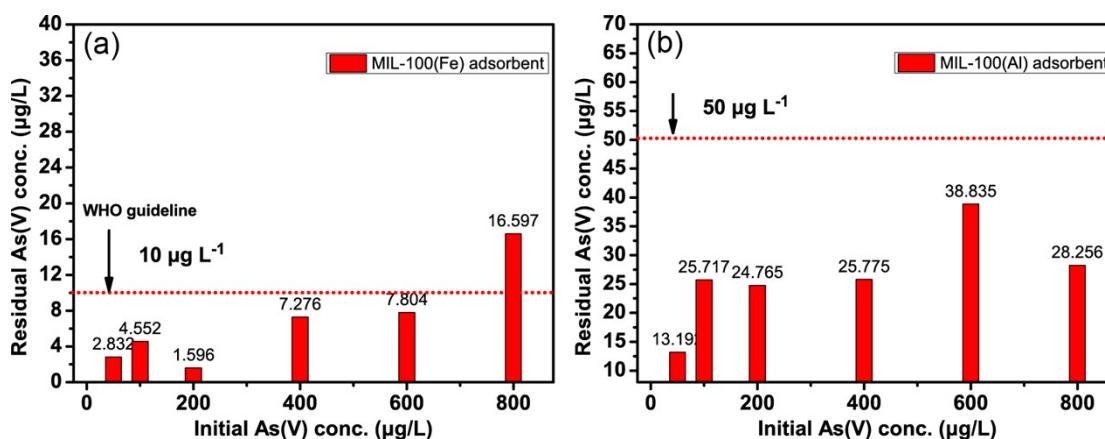

**Figure S4.** (a) The residual arsenate concentrations exploiting MIL-100(Fe) as the adsorbent for low-level arsenate removal. (b) The residual arsenate concentrations exploiting MIL-100(Al) as

the adsorbent for low-level arsenate removal ( $T = 25\text{ }^{\circ}\text{C}$ ; adsorbent doses =  $0.5\text{ g L}^{-1}$ ).

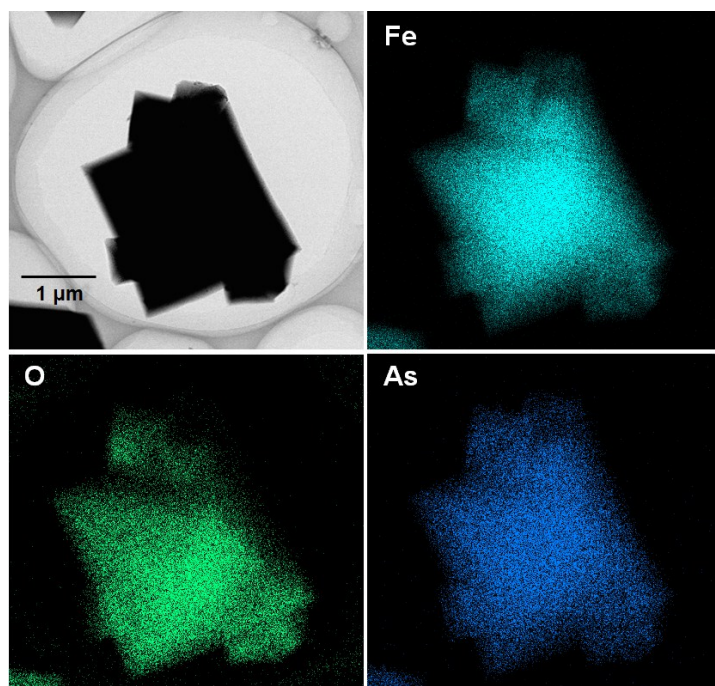

**Figure S5.** STEM images and elements dispersion of the arsenate adsorbed MIL-100(Fe).

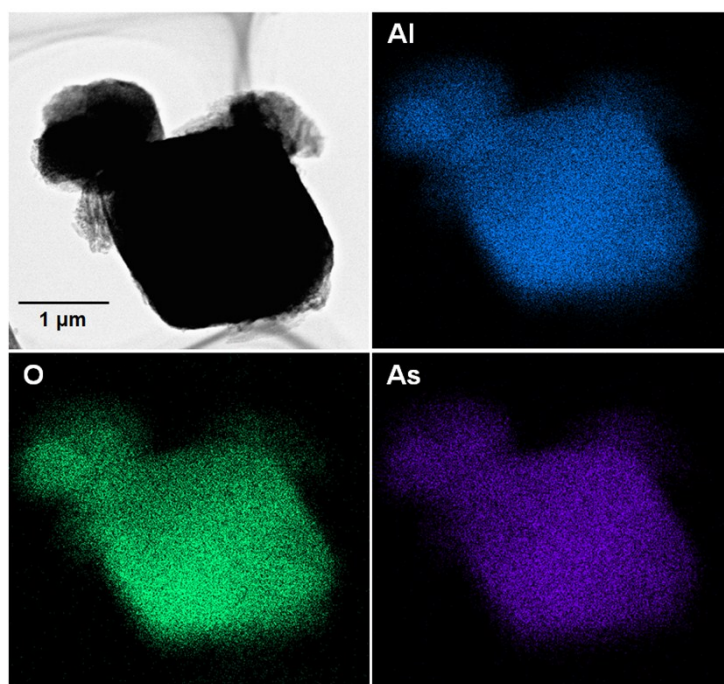

**Figure S6.** STEM images and elements dispersion of the arsenate adsorbed MIL-100(Al).

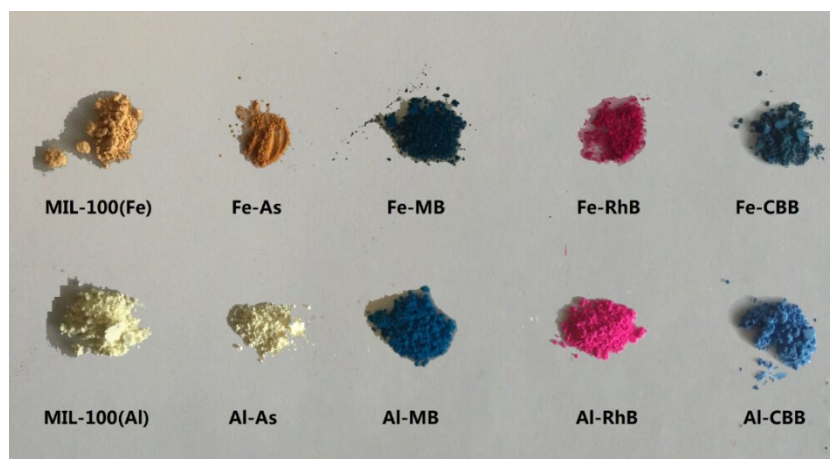

**Figure S7.** Digital photo images of the adsorbed MIL-100(Fe) and MIL-100(Al).

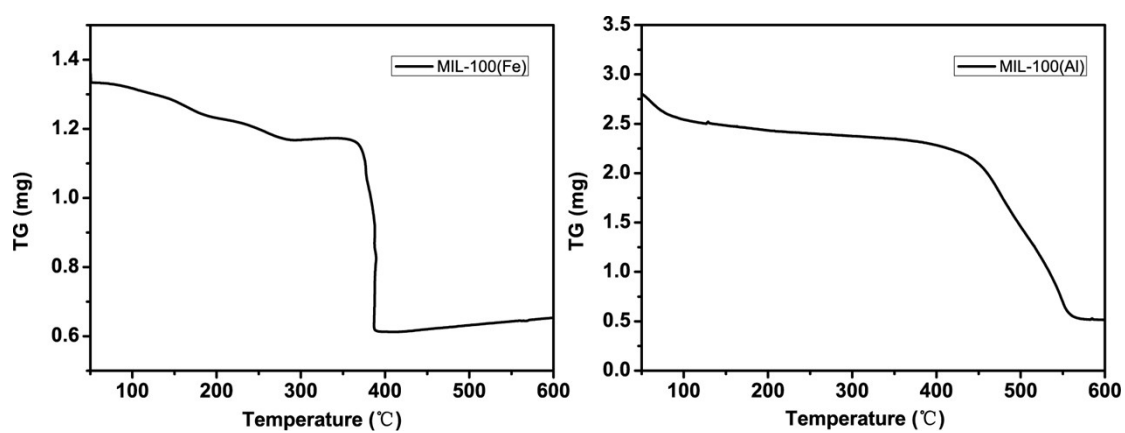

**Figure S8.** TG curve of iron and aluminum trimesate under air ambience (5 °C/min to 600 °C, hold at 50 °C for 30 min).



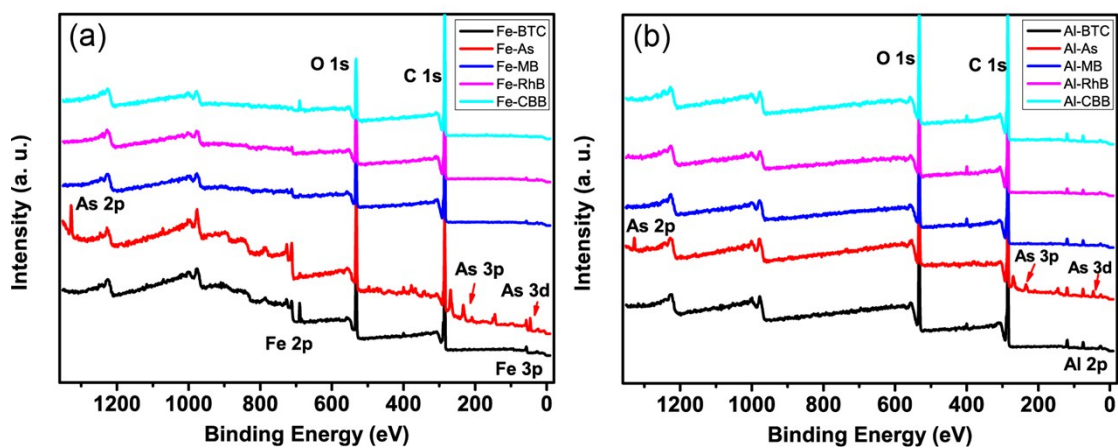

**Figure S9.** (a) XPS spectra of MIL-100(Fe) and adsorbed samples, (b) XPS spectra of MIL-100(Al) and adsorbed samples.

**Table S4.** Elements contents (atomic %) of XPS analysis.

| Elements Contents (%) | C     | N    | O     | Fe/Al | F    | As   | Na   |
|-----------------------|-------|------|-------|-------|------|------|------|
| Fe                    | 68.18 | 0.93 | 25.09 | 1.94  | 3.87 |      |      |
| Fe-As                 | 61.92 | 1.46 | 29.11 | 2.91  | 0.77 | 3.36 | 0.47 |
| Fe-MB                 | 79.62 | --   | 19.09 | 0.75  | 0.54 |      |      |
| Fe-RhB                | 79.96 | 0.62 | 18.43 | 0.67  | 0.31 |      |      |
| Fe-CBB                | 80.86 | 0.5  | 16.99 | 0.28  | 1.54 |      |      |
| Al                    | 68.45 | 1.89 | 24.98 | 4.68  |      |      |      |
| Al-As                 | 71.47 | --   | 22.86 | 4.39  |      | 1.28 | --   |
| Al-MB                 | 71.2  | 2.33 | 22.46 | 4.01  |      |      |      |
| Al-RhB                | 74.22 | 2.19 | 20.62 | 2.97  |      |      |      |
| Al-CBB                | 70.65 | 1.76 | 23.52 | 4.07  |      |      |      |

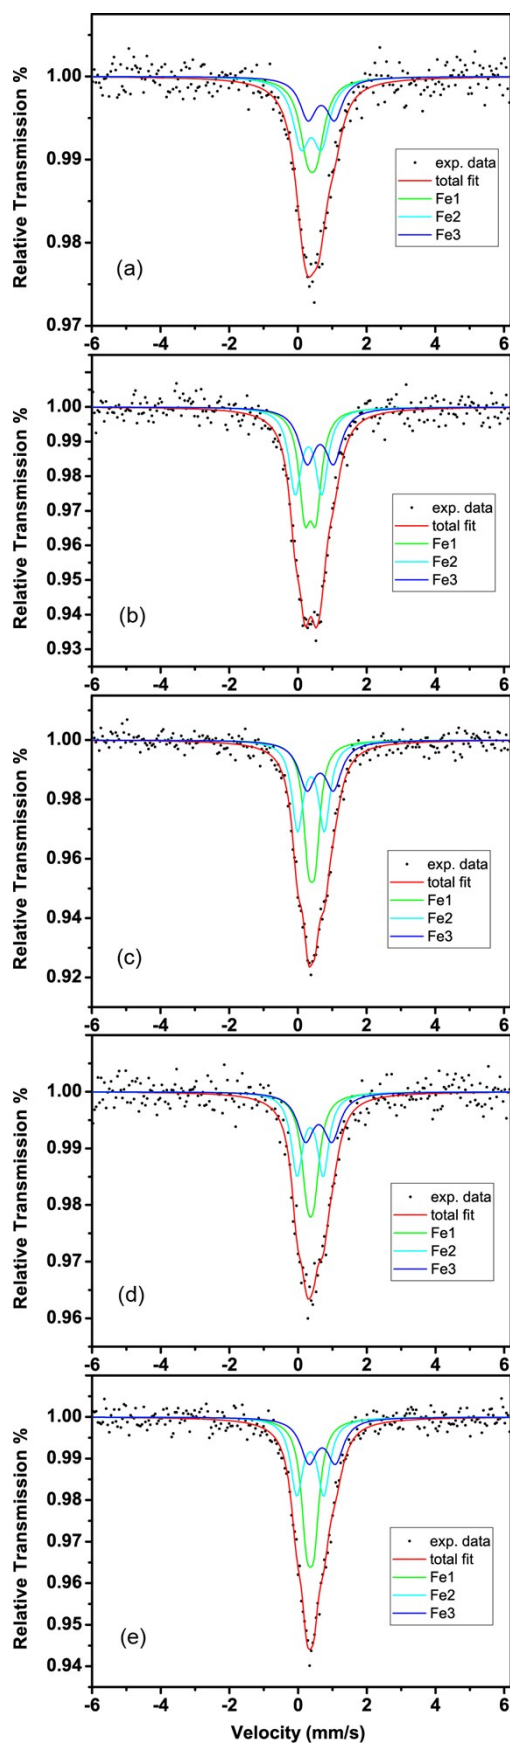

**Figure S10.** Mössbauer spectra of MIL-100(Fe) and adsorbed samples (a) before adsorption<sup>[1]</sup> (b) As(V)-adsorbed<sup>[1]</sup> (c) MB-adsorbed (d) RhB-adsorbed (e) CBB-adsorbed.

**Table S5.** Summary of Mössbauer parameters and assignment to iron species.

| MIL-100(Fe)   | $\delta$ (mm/s) <sup>a</sup> | $Q_s$ (mm/s) <sup>b</sup> | FWHM (mm/s) <sup>c</sup> | Area Ratio (%) |
|---------------|------------------------------|---------------------------|--------------------------|----------------|
| <b>Fe1</b>    | 0.41                         | 0.27                      | 0.56                     | 36.0           |
| <b>Fe2</b>    | 0.39                         | 0.59                      | 0.57                     | 39.0           |
| <b>Fe3</b>    | 0.68                         | 0.77                      | 0.58                     | 25.0           |
| <b>Fe-As</b>  | $\delta$ (mm/s)              | $Q_s$ (mm/s)              | FWHM (mm/s)              | Area Ratio (%) |
| <b>Fe1</b>    | 0.36                         | 0.32                      | 0.40                     | 36.2           |
| <b>Fe2</b>    | 0.31                         | 0.77                      | 0.43                     | 34.8           |
| <b>Fe3</b>    | 0.65                         | 0.77                      | 0.58                     | 29.0           |
| <b>Fe-MB</b>  | $\delta$ (mm/s)              | $Q_s$ (mm/s)              | FWHM (mm/s)              | Area Ratio (%) |
| <b>Fe1</b>    | 0.41                         | 0.20                      | 0.35                     | 35.0           |
| <b>Fe2</b>    | 0.38                         | 0.78                      | 0.40                     | 37.0           |
| <b>Fe3</b>    | 0.65                         | 0.77                      | 0.58                     | 28.0           |
| <b>Fe-RhB</b> | $\delta$ (mm/s)              | $Q_s$ (mm/s)              | FWHM (mm/s)              | Area Ratio (%) |
| <b>Fe1</b>    | 0.36                         | 0.19                      | 0.42                     | 35.0           |
| <b>Fe2</b>    | 0.35                         | 0.76                      | 0.41                     | 36.0           |
| <b>Fe3</b>    | 0.60                         | 0.77                      | 0.58                     | 29.0           |
| <b>Fe-CBB</b> | $\delta$ (mm/s)              | $Q_s$ (mm/s)              | FWHM (mm/s)              | Area Ratio (%) |
| <b>Fe1</b>    | 0.36                         | 0.21                      | 0.39                     | 40.0           |
| <b>Fe2</b>    | 0.35                         | 0.78                      | 0.43                     | 34.0           |
| <b>Fe3</b>    | 0.70                         | 0.77                      | 0.58                     | 26.0           |

[a] Isomer shift or chemical shift ( $\delta$ ),

[b] Quadrupole splitting ( $Q_s$ ),

[c] Full width at half maximum (FWHM)

**Reference:**

- [1] J. Cai, X. Wang, Y. Zhou, L. Jiang, C. Wang, Phys. Chem. Chem. Phys. 2016, 18, 10864-10867.
